# Supplementary material for: Association between psychological distress of each points of the treatment of esophageal cancer and stress coping strategy
Source: PubMed Central journal article supplement (PMC9450358; doi:10.1186/s40359-022-00914-5), 2022-09-06

Supplemental Figure

Receiver-operating characteristic curve for psychological distress in our risk model at times 1-5.

(a) time 1, before definitive diagnosis

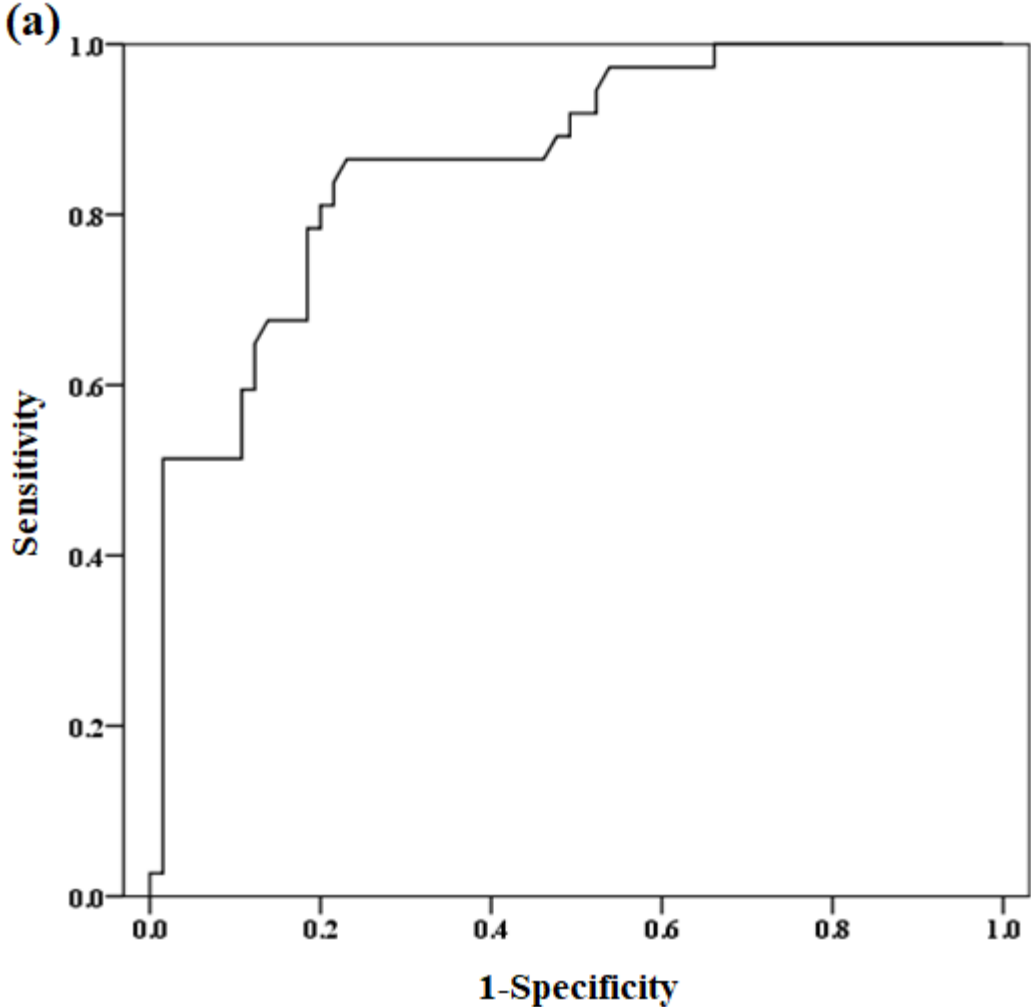

(b) time 2, after determination of clinical stage

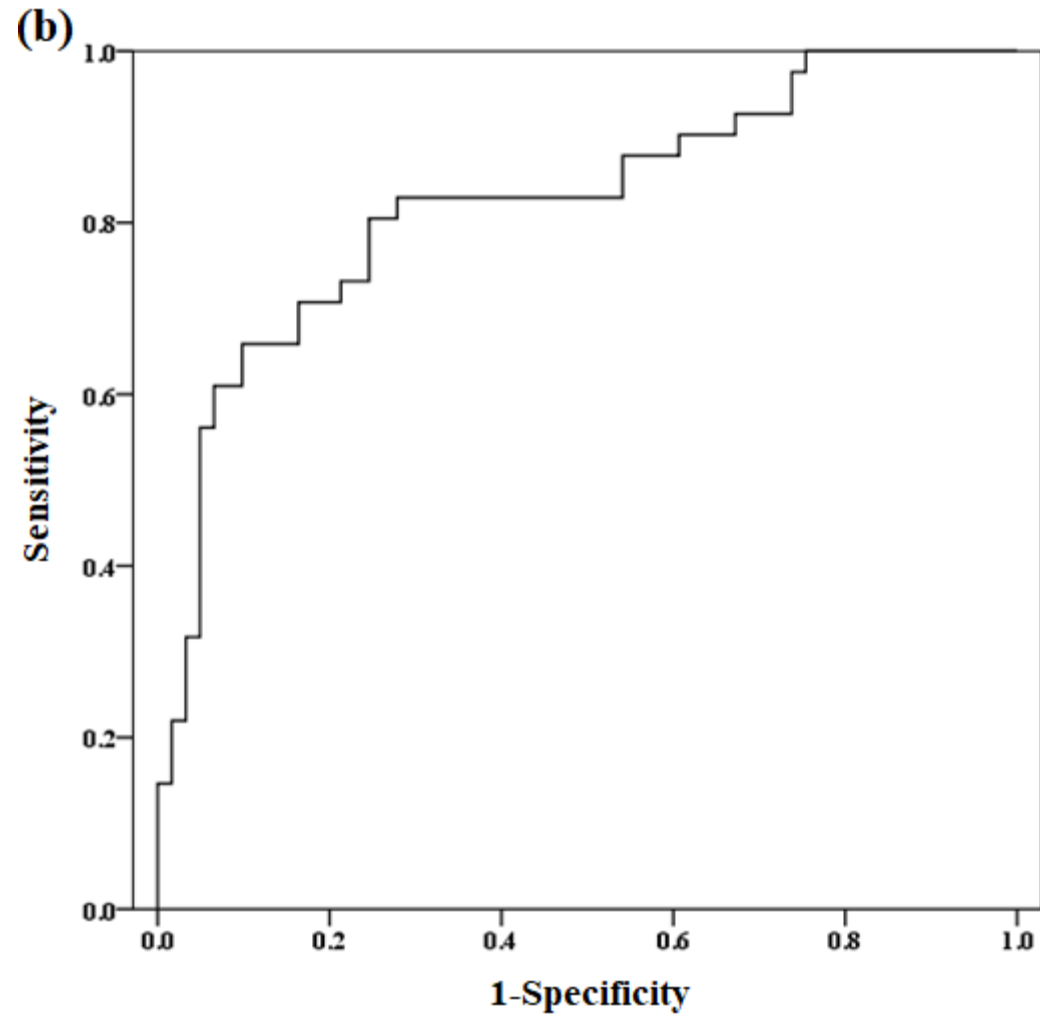

(c) time 3, postoperatively before final staging

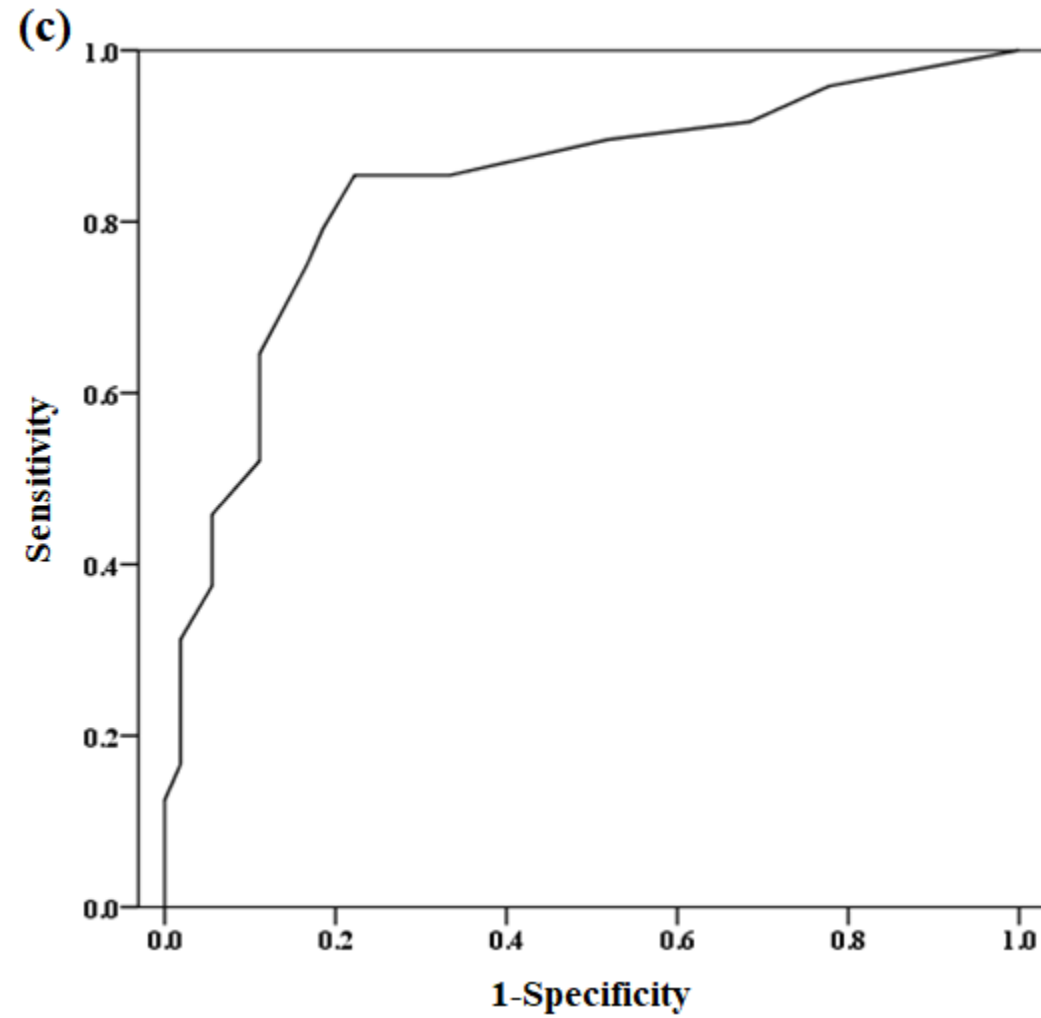

(d) time 4, determination of final stage at 1 month after esophagectomy

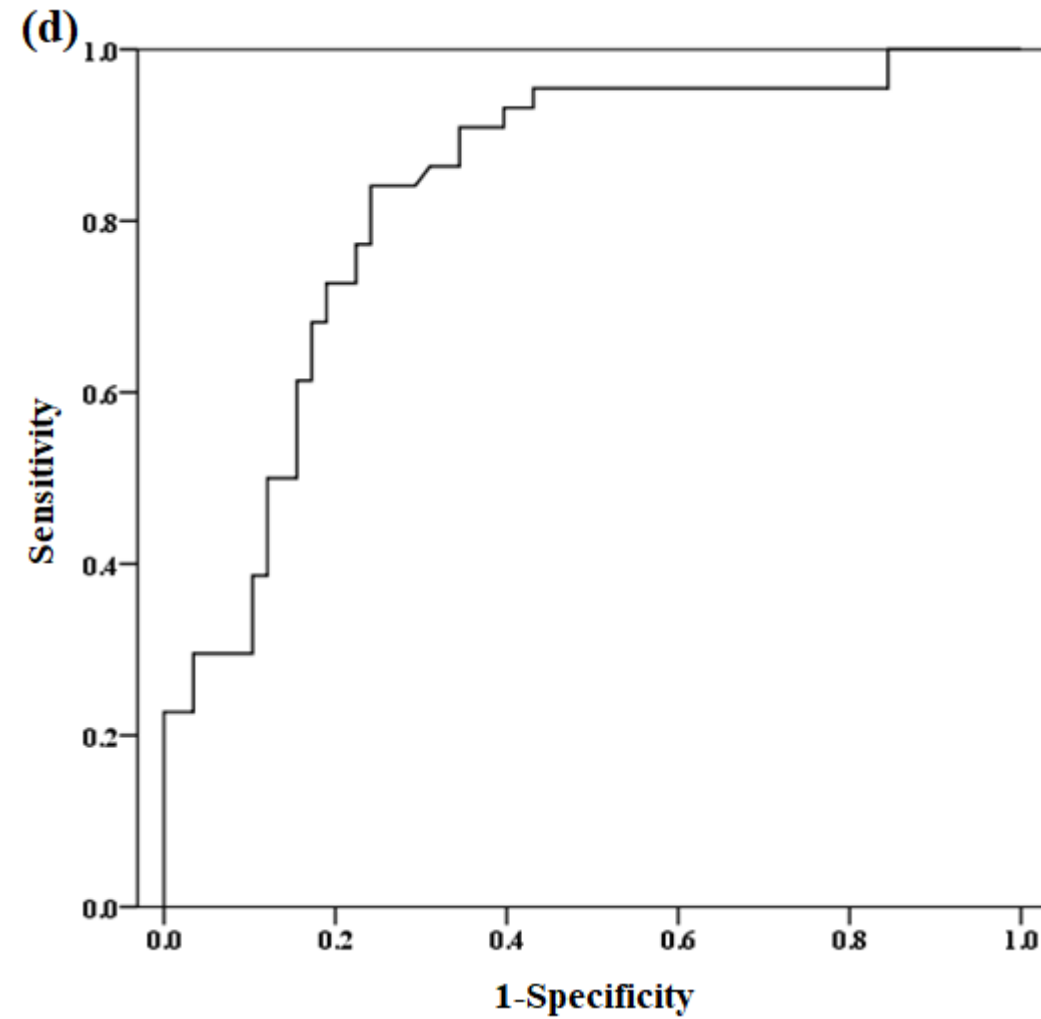

(e) time 5, 3 months after esophagectomy

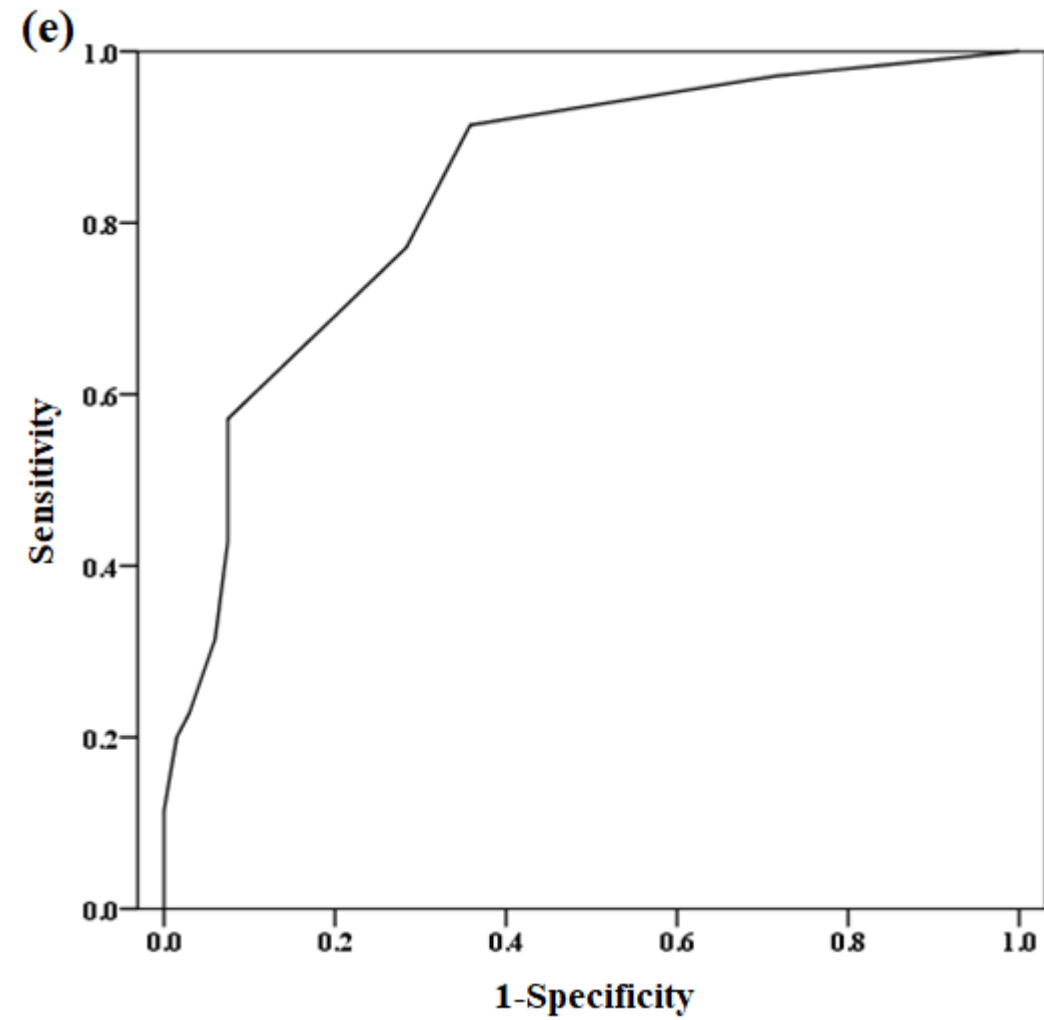

Supplement: 40359_2022_914_MOESM1_ESM.pdf [file 40359_2022_914_MOESM1_ESM.pdf]
